# Supplementary material for: Pathogenic variants in the DEAH-box RNA helicase DHX37 are a frequent cause of 46,XY gonadal dysgenesis and 46,XY testicular regression syndrome
Source: PubMed Central journal article supplement (PMC6944638; doi:10.1038/s41436-019-0606-y), 2019-07-24

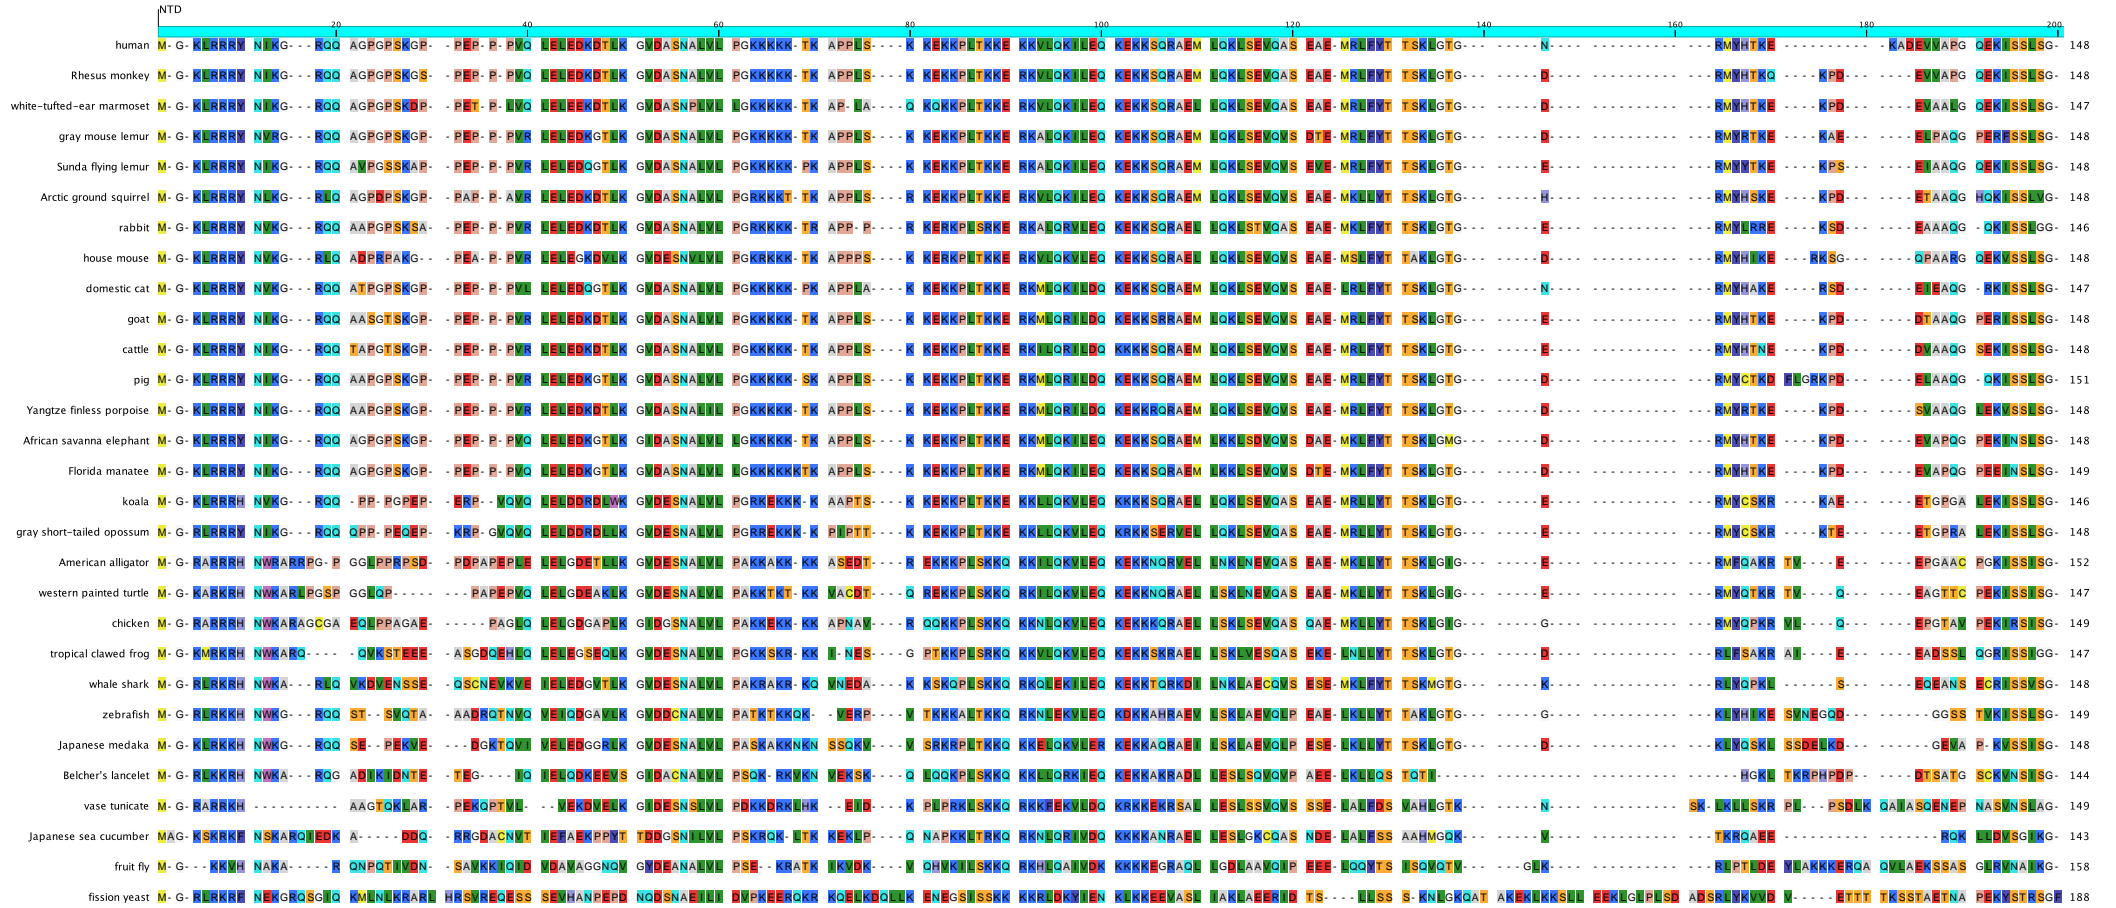

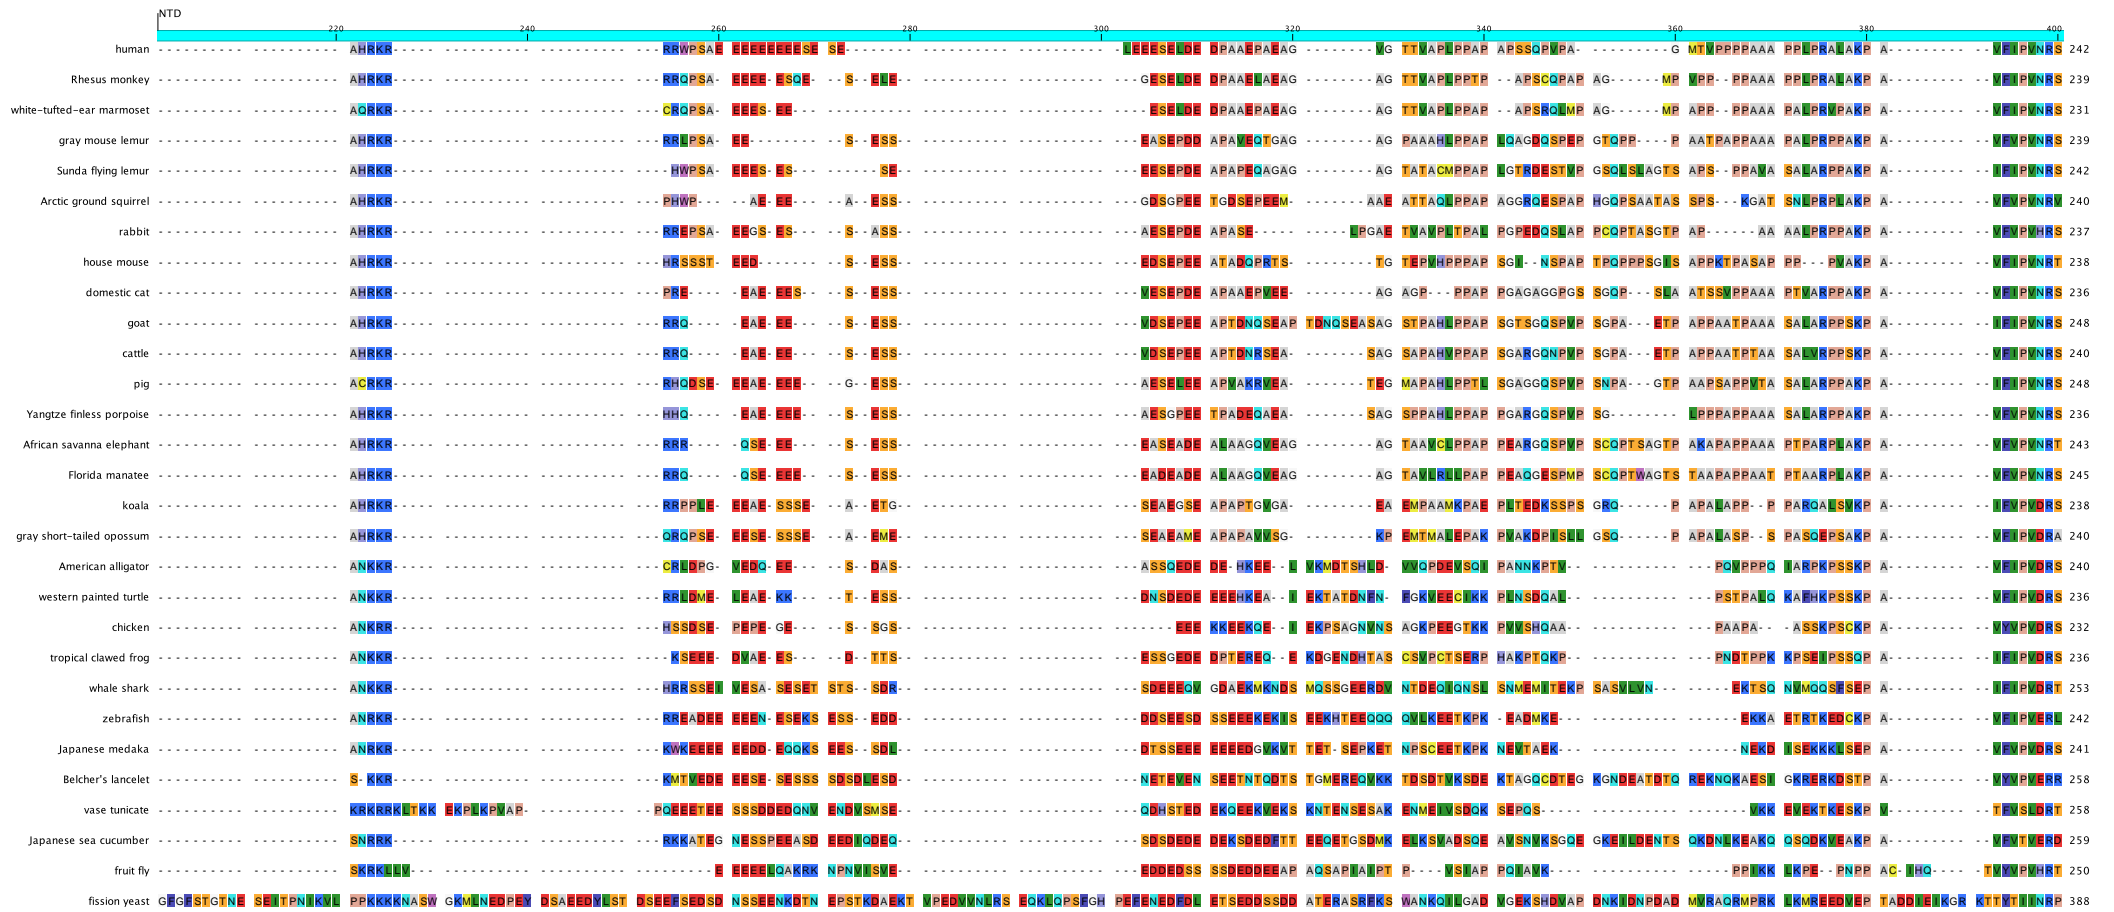

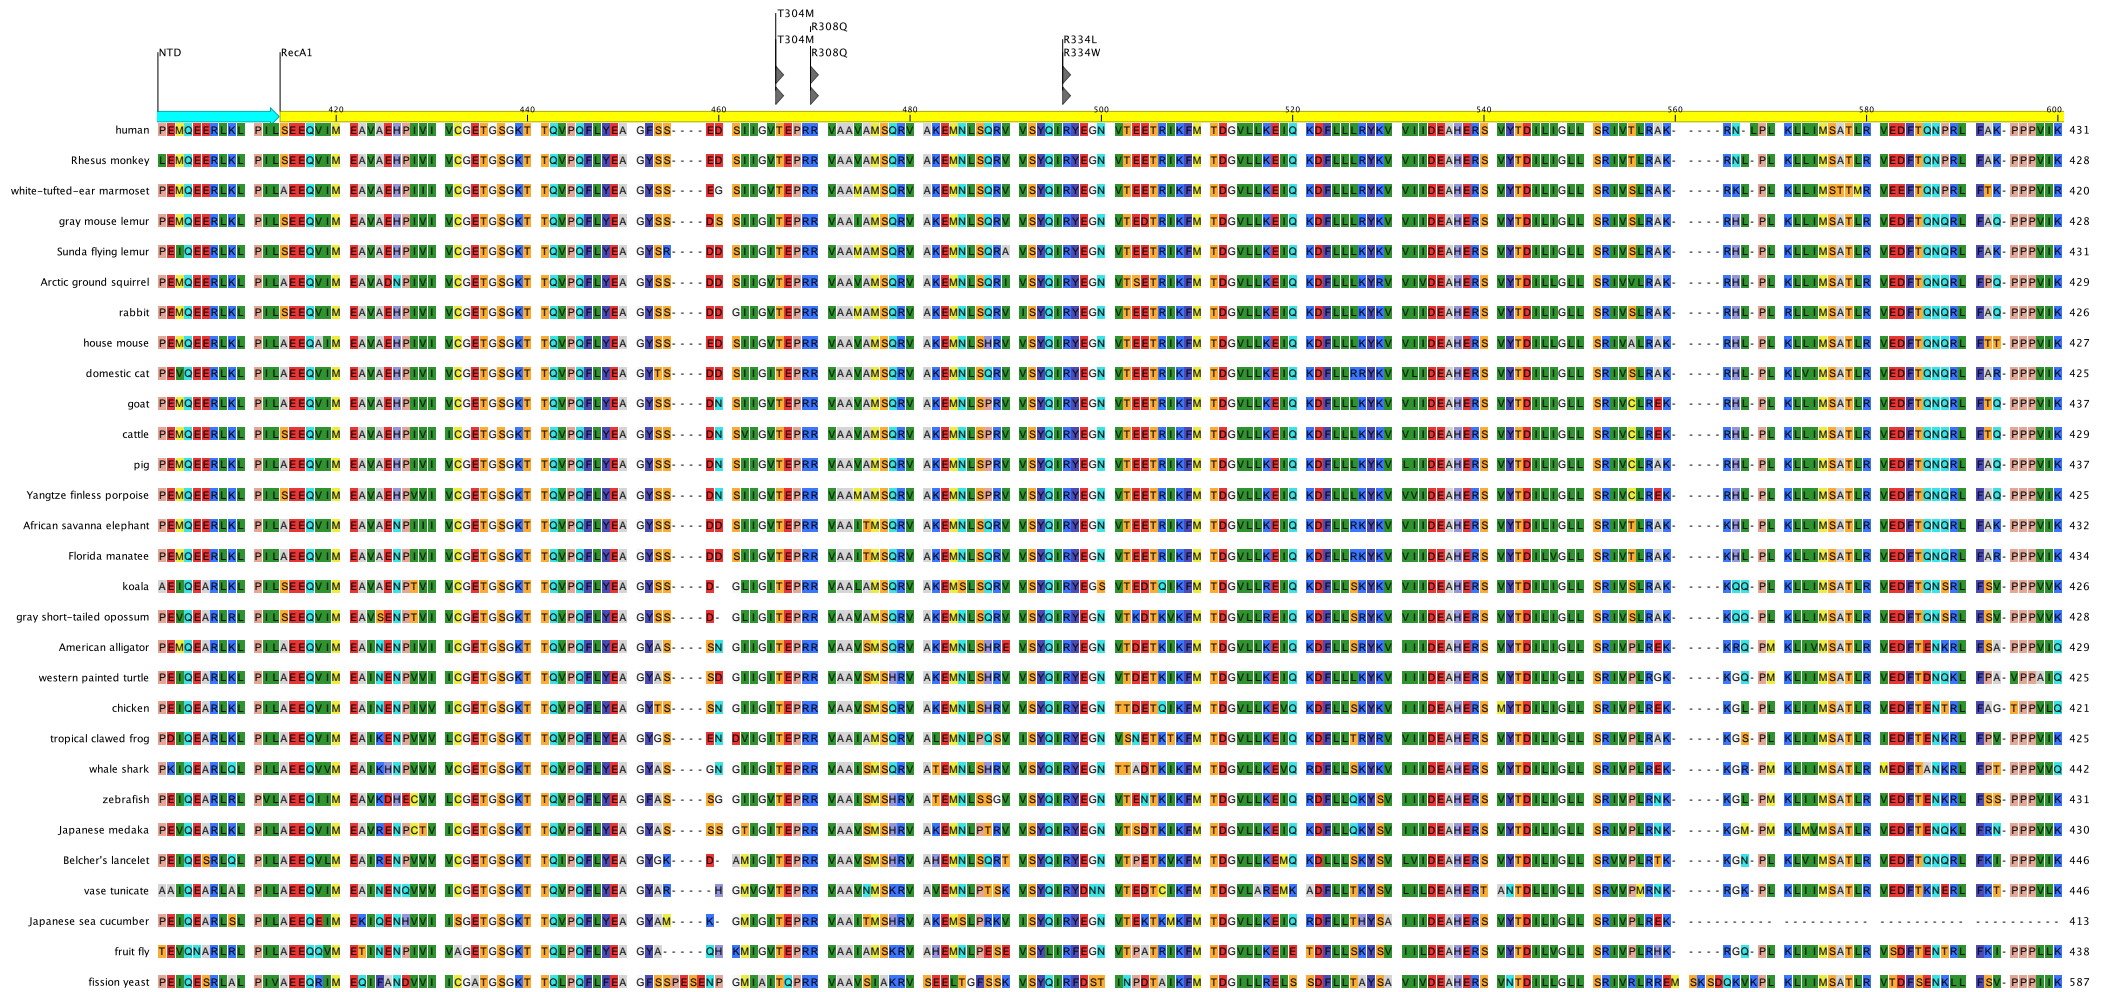

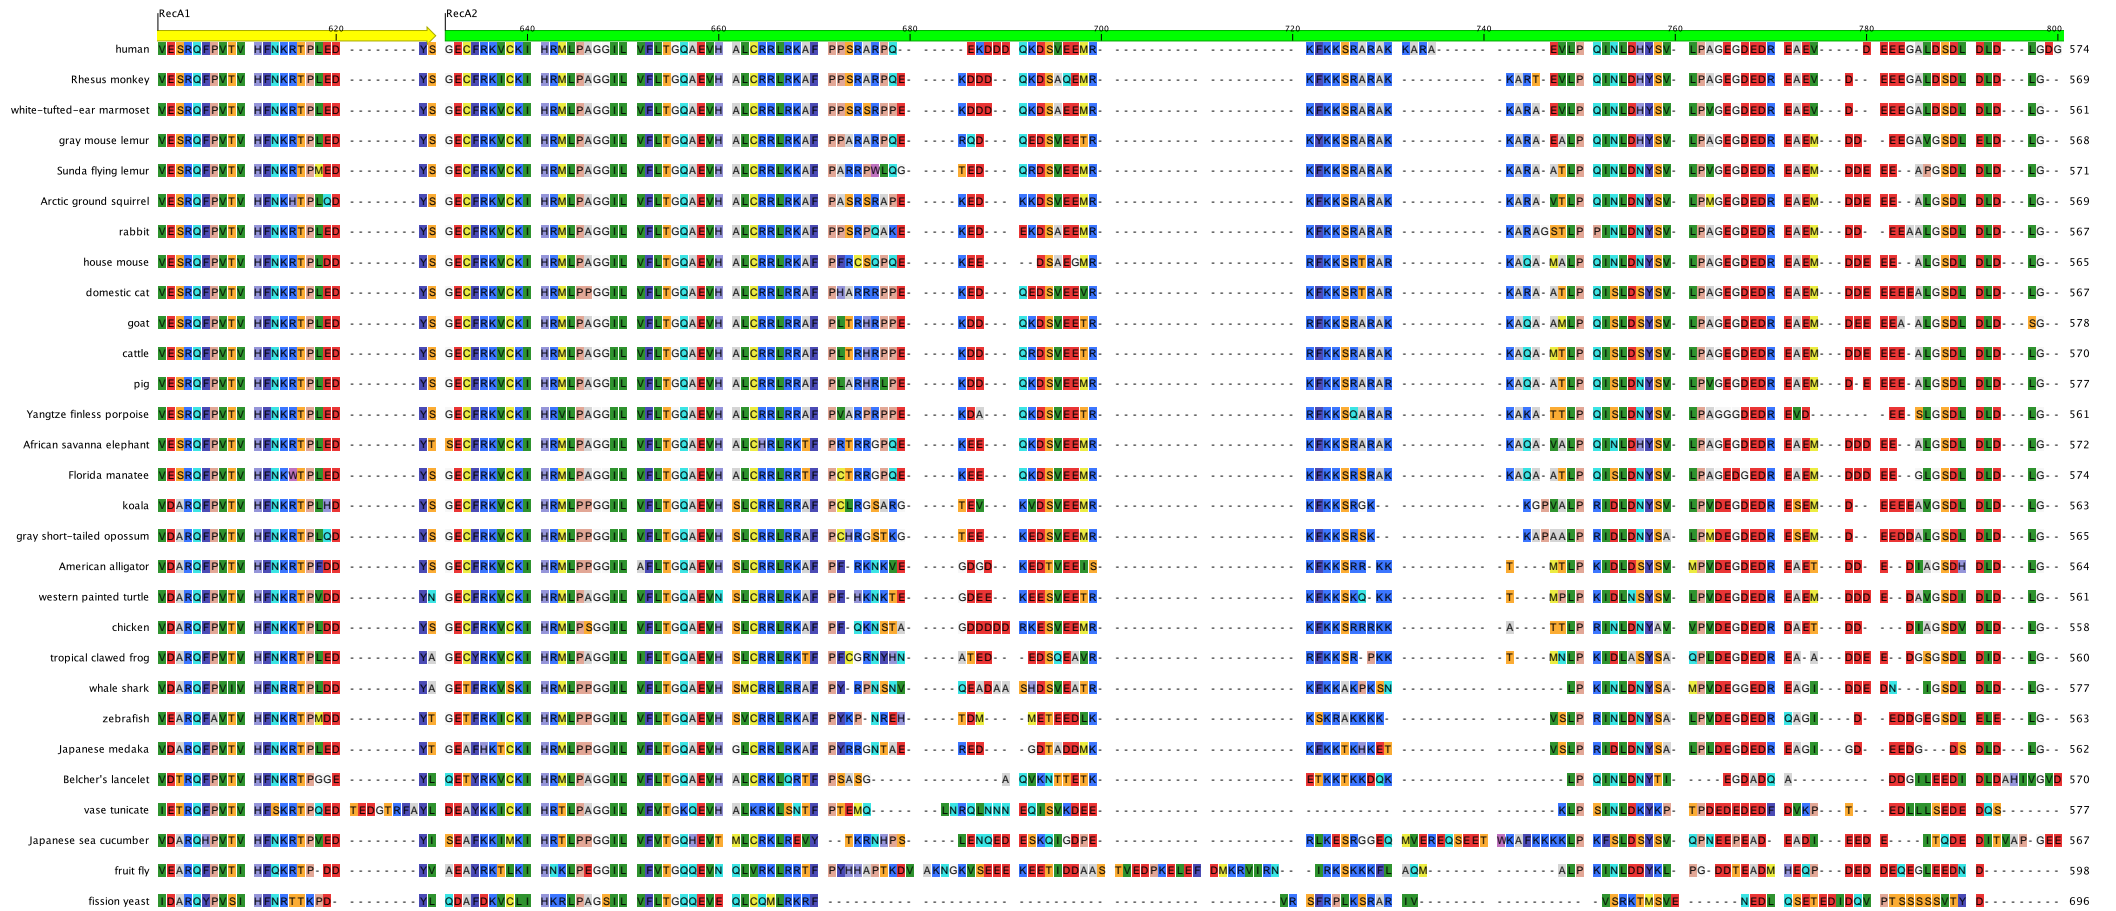

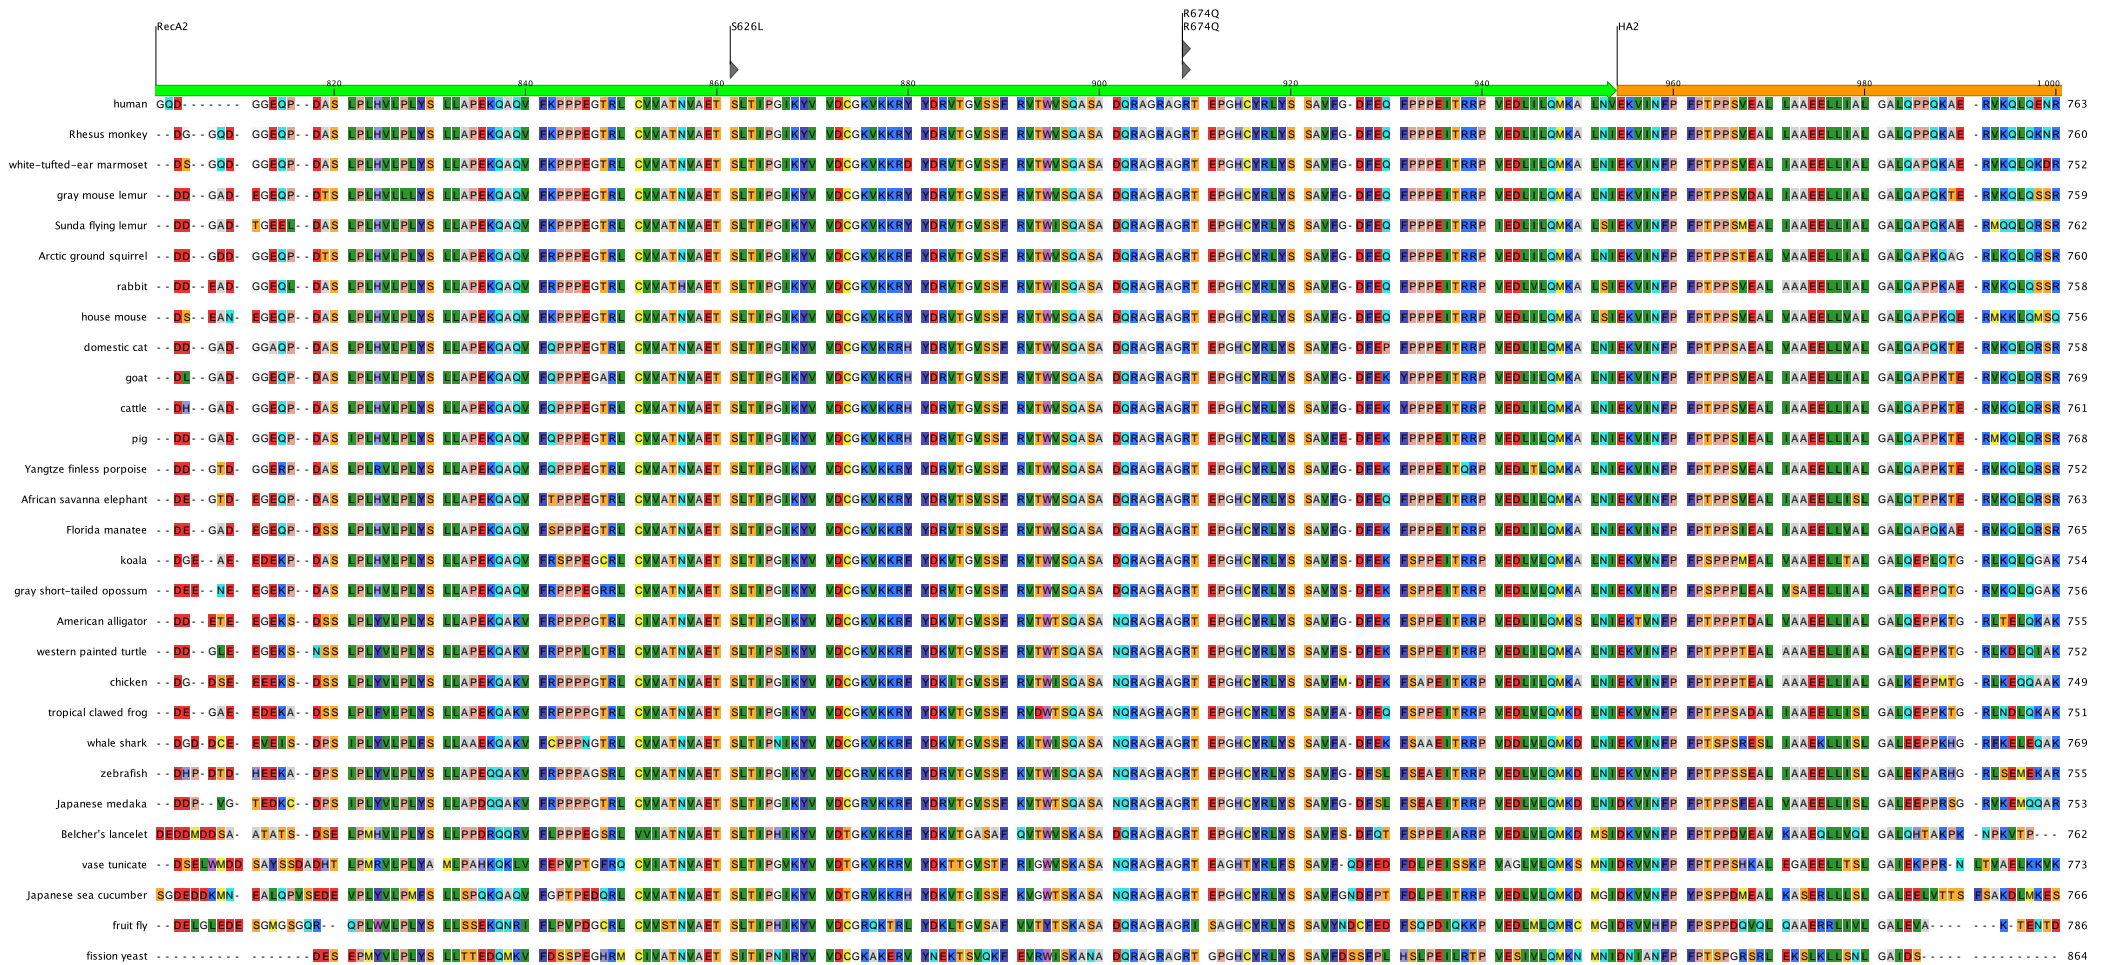

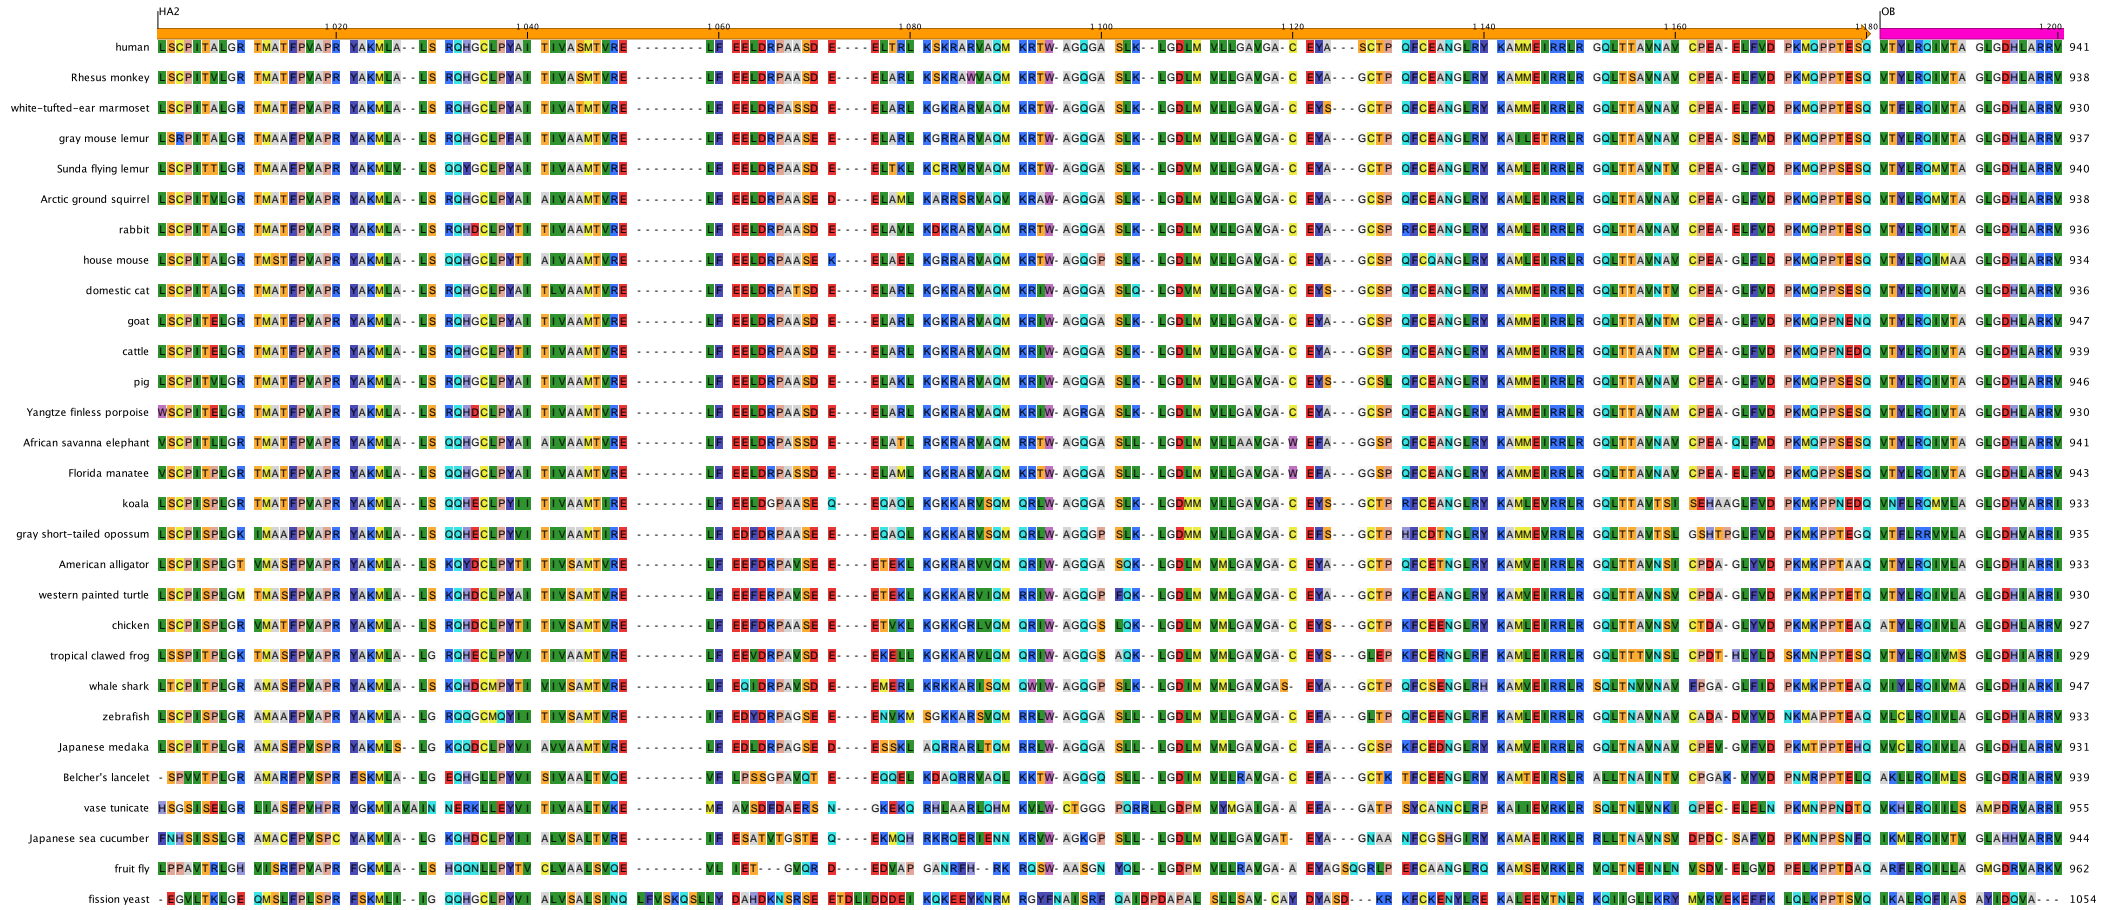

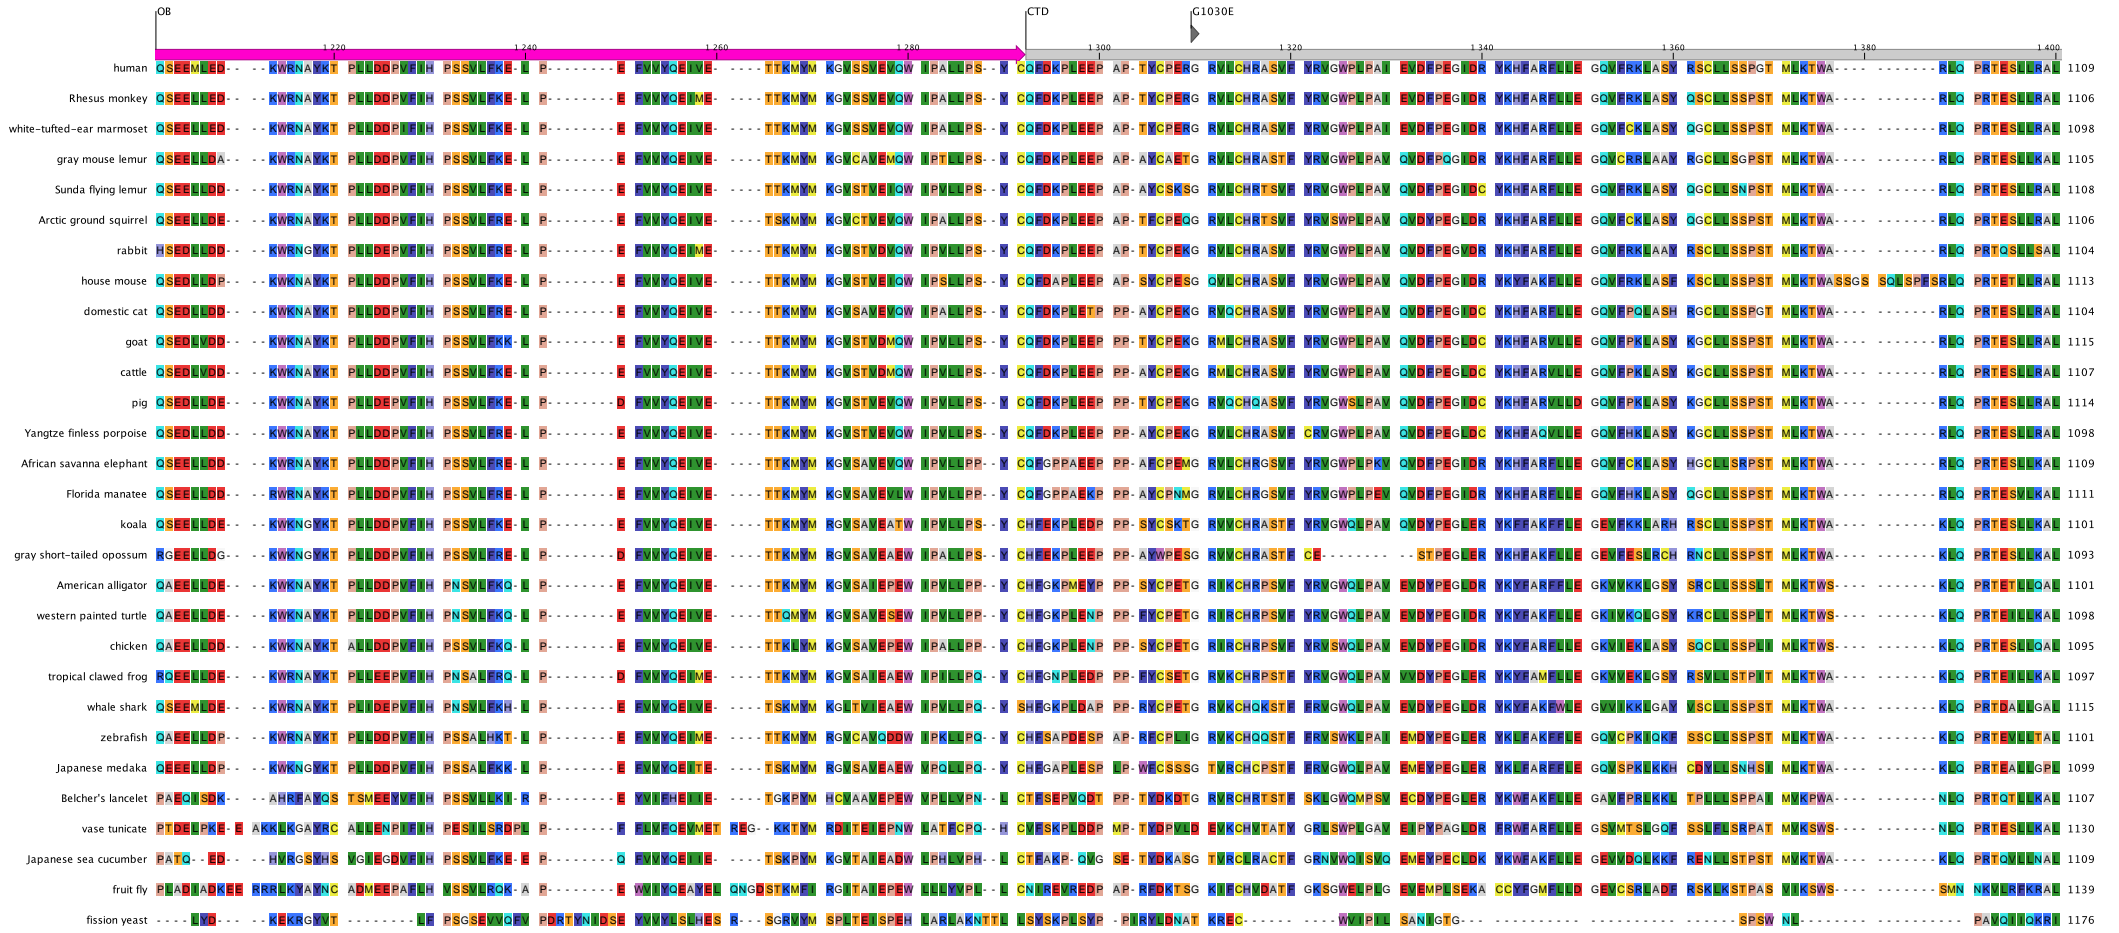

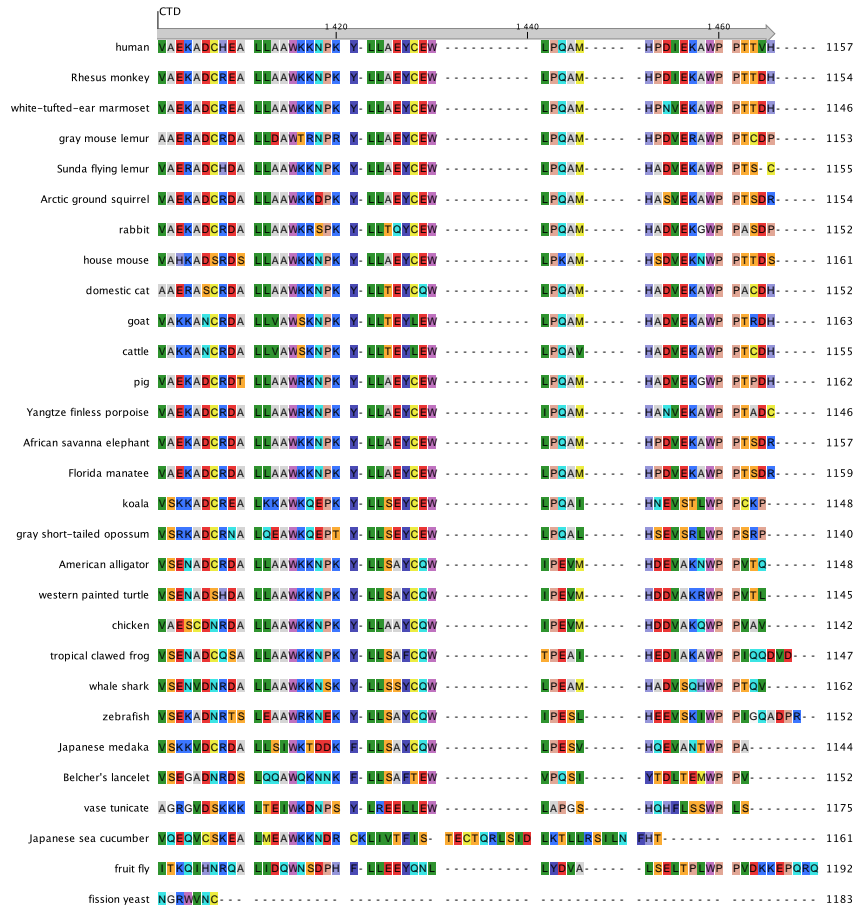

Supplement: 41436_2019_606_MOESM2_ESM.pdf [file 41436_2019_606_MOESM2_ESM.pdf]
